1    **Application of UV-cured resin as embedding/mounting media for practical, time-**  
2    **saving otolith specimen preparation**

3

4

5    Carlos Augusto Strüssmann\*, Kaho Miyoshi, Shota Mitsui

6

7    Graduate School of Marine Science and Technology, Tokyo University of Marine Science  
8    and Technology, 4-5-7 Konan, Minato-ku, Tokyo 108-8477, Japan

9

10    \* **Corresponding author:** Carlos Augusto Strüssmann, Graduate School of Marine  
11    Science and Technology, Tokyo University of Marine Science and Technology, 4-5-7  
12    Konan, Minato-ku, Tokyo 108-8477, Japan. E-mail: carlos@kaiyodai.ac.jp; Tel: + 81-3-  
13    5463-0541; Fax: + 81-3-5463-0541.

14

15    **E-mail address of co-authors:**

16    Kaho Miyoshi (m\_dta08@yahoo.co.jp)

17    Shota Mitsui (shomitsui@gmail.com)

18

19 **Abstract**

20 Otoliths are calcified structures located in the inner ears of fish, as in most vertebrates,  
21 that are responsible primarily for the perception of gravity, balance and movement, and  
22 secondarily of sound detection. Microstructural and chemical analyzes of the inner otolith  
23 growth layers, called increments, constitute powerful tools to estimate fish age and  
24 elucidate many life history and demographic traits of fish populations. Otolith analyzes  
25 often require the production of a thin cross section that includes in the same plane of view  
26 the otolith core and all microscopic layers formed from birth until the moment of collection  
27 (otolith edge). Here we report on the usefulness of UV-cured resins that have become recently  
28 popular among nail artists and hobbyists for otolith specimen preparation. We show that  
29 single-component UV-cured resins can replace successfully and advantageously the  
30 commonly used two-component Epoxy resins to obtain otolith cross sections suitable for  
31 both microstructural examination and chemical analysis by electron probe microanalysis.  
32 UV-cured resins provide on-demand, extremely rapid (minute-order) hardening and high  
33 transparency, while providing similar adhesion and mechanical support for the otoliths  
34 during processing and analysis as Epoxy resins. UV-cured resins may revolutionize  
35 otolith specimen preparation practically- and time-wise, and may be particularly useful  
36 in teaching and workshop situations in which time for otolith embedding is a constraint.

37

38 **Keywords:** Otolith, Cross section, Embedding, Epoxy resin, UV-cured resin

39

## 40 **1. Introduction: otoliths in fisheries science and resource management**

41 Otoliths are calcified structures located in the inner ears of fish, as in most vertebrates,  
42 that are responsible primarily for the perception of gravity, balance and movement, and  
43 secondarily of sound detection. Some invertebrates like cephalopods also possess similar  
44 structures called statoliths (Dilly, 1976). Fish otoliths grow in size as fish age by  
45 consecutive accretion of layers, called increments, in proportion to somatic growth under  
46 a species-specific and environment-dependent relation (Stormer and Juanes, 2016). The  
47 increments are composed mainly of crystalline calcium carbonate embedded in an organic  
48 matrix and are layered consecutively on the outer surface of the otolith starting from a  
49 microscopic core formed during early embryonic development (Campana and Nielson,  
50 1985; Watanabe and Kuji, 1991; Morales-Nin et al., 2005). Calcium carbonate and  
51 organic matter deposition follow primarily a diel rhythm, with the former predominating  
52 at daytime and the latter at nighttime, and secondarily a seasonal rhythm that alternates  
53 periods of intense and reduced somatic growth (Mugiya, 1987; Kono et al., 2014).

54 Analyses of the otolith microstructure and chemistry constitute powerful tools to

55 elucidate life history and demographic traits of fish populations (Stevenson and Campana,  
56 1992; Campana et al., 2016; Neville et al., 2018). The incremental, patterned deposition  
57 of materials on the otolith surface can be visually recognized as “annual” and “daily”  
58 rings whose identification provides information on an individual’s age in years or even in  
59 days and therefore can be used to clarify its year or even date of birth (Tsukamoto et al.,  
60 1989; Fowler, 1990). Likewise, the width of the daily and annual increments provides  
61 information on the amount of somatic growth during a particular day or period in life  
62 (Jones, 1992; Castellini et al., 2017; Watai et al., 2017). On the other hand, the chemical  
63 composition of the daily increments is affected by the physiological status of the fish and  
64 by the surrounding habitat’s abiotic conditions such as water chemistry and temperature  
65 (Radtke, 1989; Campana, 1999; Secor and Rooker, 2000). Unlike in true bones whose  
66 constituents can be resorbed under periods of food deprivation or environmental stress,  
67 the chemical composition of the otolith increments is fixed for life (Campana, 1983; Ichii  
68 and Mugiya, 1983). Thus, chemical analysis of individual increments, which as noted  
69 earlier can be ascribed to particular ages or life stages, may provide critical information  
70 on the current and past environmental experiences and physiology-altering events (e.g.  
71 reproduction, metamorphosis, migrations, settlement, etc) of individual fish (Zenitani et  
72 al., 2007; Hamilton and Warner, 2009; Shiao et al., 2010; GrønkJær, 2016; Arai and Chino,

73 2018).

74

## 75 **2. Current methods for otolith specimen preparation**

76 The methodology on fish otolith specimen preparation has been elegantly reviewed  
77 in Stevenson and Campana (1992). Small otoliths such as those from larval and juvenile  
78 stages often are thin and transparent enough to allow visualization of the increments by  
79 simple clearing and mounting on a glass slide. However, structural analysis of otoliths  
80 from medium to large-sized specimens and chemical analysis of the inner increments in  
81 otoliths of any size require the production of a more or less thin cross section of the otolith  
82 that exposes in the same plane of view the otolith core and all layers formed from birth  
83 until the moment of collection (otolith edge). Otoliths are hard but relatively brittle and  
84 may be small and difficult to process into a section without support. Thus, cross sections  
85 are usually obtained after embedding it to produce a block or mounting it on a glass slide  
86 or prop with a liquid media that is subsequently hardened (cured) by physical (e.g. heat)  
87 or chemical (e.g. catalyzer) means and which would support the otoliths during the  
88 sectioning/lapidating/polishing process. The techniques and media used for otolith  
89 embedding or mounting have been reviewed by Secor et al. (1992). Otolith researchers  
90 have experimentally used a variety of resins, glues, or waxes in otolith specimen

91 preparations but by far the majority of the otolith studies published used some variant of  
92 Epoxy resins. This is probably due to their high transparency and chemical stability  
93 during long term storage.

94 Each type of medium used for otolith specimen preparation have advantages and  
95 disadvantages and very often these tradeoffs limit their applicability. Embedding media  
96 properties include final hardness, which affects the easiness of cutting and polishing,  
97 permeability into or adhesion to the surface of the otoliths (associated with differences in  
98 medium viscosity and hydrophilicity), transparency and/or occurrence of air bubbles  
99 before or after hardening, which affects observation by transmitted light microscopy,  
100 chemical stability during storage or chemical analysis (for example, while under an  
101 electron beam for electron probe microanalysis), and many others. One important  
102 property is the time for hardening, which can be troublesome both if the embedding  
103 medium starts hardening too soon when the otolith is still being oriented in the molding  
104 cast or too slow, meaning that several hours to days will be spent until a casting of  
105 sufficient hardness for processing can be obtained. It is beyond the scope of this report to  
106 compare the advantages and disadvantages of all available embedding/mounting media  
107 for otoliths, for which the reader is referred to Secor et al. (1992).

108

### 109 **3. Advantages of UV-cured resins for otolith embedding and specimen properties**

110 Here we report on the usefulness of UV-cured resins that have become recently  
111 popular among nail artists, DIY jewelers and other hobbyists, to produce otolith cross  
112 sections suitable for both microscopical examination of structure and chemical analysis  
113 by electron probe microanalysis (EPMA). We have experienced with the acryl acrylate  
114 type of UV-cured resins for the past 18 months and have come to the conclusion that they  
115 can replace advantageously other types of resins like the traditionally used Epoxy resins  
116 in most, if not all situations. The basic properties of UV-cure resins that relate to otolith  
117 preparation are as follows.

118 1) On-demand, extremely rapid curing. Practical, grinding/polishing-level hardness is  
119 obtained within minutes depending on the block thickness and power of the UV  
120 light source. In contrast, traditional one- or two-component Epoxy resins may take  
121 hours or days to harden depending on temperature and otoliths embedded in them  
122 occasionally change their position (shift, twist, turn) during hardening. Of equal  
123 importance, hardening only starts under illumination with the appropriate  
124 wavelength (in this case c.a. 365–400 nm). This ensures unlimited working time  
125 for otolith observation and orientation during embedding/mounting, but conversely,  
126 that otoliths can be immobilized in the desired orientation almost immediately by

127 turning on a UV light source (Fig. 1).

128 2) High transparency before and after hardening. This ensures that otoliths can be  
129 clearly visualized inside the blocks at any time. This property is critical when  
130 attempting to locate the position of the otolith core during embedding (before  
131 hardening) or during cutting/grinding (after hardening) (Figs. 1, 2). This  
132 characteristic is particularly suited for using orientation blocks with guidelines to  
133 help locate the approximate position of the nucleus and the distance remaining from  
134 the grinding/polishing edge to the nucleus during processing as we perform in our  
135 laboratory (Strüssmann CA and Colautti DC; Patent pending).

136 3) Sufficient hardness for grinding and polishing. UV-cured resins provide adequate  
137 mechanical support for the otoliths during processing until the obtention of cross  
138 sections (Figs. 3–5). This is important to prevent cracking of the otoliths that are  
139 common with softer, fast-hardening embedding/mounting media such as  
140 thermoplastic glues or waxes. Shrinkage may be slightly higher than with  
141 traditionally used Epoxy resins and this could be a problem for small or brittle  
142 otoliths, but we have not experienced any significant problems to date.

143 4) Strong adhesion to the otoliths. The otoliths become firmly attached to the resin  
144 and do not detach during wet grinding or polishing. We have not yet tested if



145           adhesion is sufficient for cutting with a precision cutter, so this aspect needs further  
146           testing.

147       5) Thermoplastic stability under an electron beam. UV-cured resins seem to be as  
148           stable under an electron beam as the Epoxy resins traditionally used for embedding  
149           of EPMA specimens (Fig. 6). The results of semi-quantitative EPMA analysis of  
150           UV-cured and Epoxy resins indicate a slightly different chemical composition, e.g.  
151           higher Sulphur content of UV-cured resin vs higher Chlorine content for Epoxy  
152           resins (Fig. 7) but this has no bearing on the results of otolith chemical composition  
153           (see 6). Of great importance, in over 18 months of use for EPMA analyses of  
154           hundreds of otolith specimens we not noticed any change in the rate of EPMA  
155           column contamination due to the use of UV-cured resin as compared to Epoxy resin.

156       6) Finally, as concerns the chemical analysis of otoliths for reconstruction of the  
157           environmental history of individual fish, utilization of UV-cured resins do not  
158           affect significantly the elemental composition of otoliths as determined by EPMA  
159           (Figure 8). A note of caution is that otoliths embedded in UV-cured resin appear to  
160           have somewhat higher Calcium values than those in Epoxy resin. However, this  
161           would only be a problem when trying to compare results obtained with specimens  
162           prepared by different methods. Moreover, we have not tested the effects of UV-

163 cured resin embedding on the isotopic composition of otoliths.

164 There are also additional advantages in the use of UV-cured resins. Due to the  
165 combination of transparency and hardness, UV-cured resins can be used as a base for  
166 otoliths sections that is suitable for direct microscopic observations without a glass slide.  
167 This may be relevant also because more often than not otolith cross sections fixed by  
168 glues or resins detach from a slide glass during final polishing, observation, or long-term  
169 storage. Moreover, this resin base, if molded in an appropriate size and thickness, can also  
170 fit a microscope stage or EPMA specimen holder directly (Fig. 2).

171

#### 172 **4. Remaining problems and concerns with UV-curd resins**

173 All of these advantages are not without a price, literally, as UV-cured resins are  
174 at present slightly more expensive than the traditional chemically-hardened Epoxy resins.  
175 However, prices should theoretically drop in coming years due to the increase in their  
176 popularity, diversification of manufacturers, and technological advances in production. A  
177 word of caution is also necessary in that little is known about their safety. UV-resins seem  
178 to be relatively safe assuming from their growing use (Flexo Magazine (Environotes):  
179 <http://128.174.142.16/sheets/flexo/uvcuringhealthandsafety.pdf>. “Accessed on 4 May  
180 2018”).) but this may simply reflect their novelty and lack of long-term safety studies.

181 Thus, we strongly emphasize that this report does not constitute an endorsement on their  
182 safety. In fact, we strongly recommend the use of laboratory safety and precaution  
183 measures (googles, gloves, ventilation, etc) associated with the use of possibly harmful  
184 chemicals until more is known on their safety. The same applies to the use of UV-emitting  
185 devices for curing these resins. The UV-wavelength required to cure the commercially  
186 available UV-resin tested in this study is rather near the spectrum of violet/blue (UVA;  
187 365–400 nm), but even if they were not as dangerous as UVB or UVC, they still have a  
188 relatively high energy content and may be associated with the so-called “blue-light  
189 hazard”. So before embarking on its use, we suggest that interested readers search for the  
190 latest information on the safety of UV-cured resins in public or governmental sites and  
191 the respective manufacturer’s MSDS, as well as on the illuminating  
192 apparatus/wavelengths used for hardening.

193

## 194 **5. Concluding remarks**

195 All of these pending safety issues notwithstanding, the authors believe that the  
196 use of UV-cured resins may revolutionize otolith specimen preparation practically- and  
197 time-wise, and therefore may be extremely useful in situations such as teaching and  
198 workshops in which time for otolith embedding is a constraint. Finally, while this report

199 is concerned only with the Acryl Acrylate-based resin, further experimentation with other  
200 types of UV-cured resins (e.g. Epoxy- or Vinyl-based resins) may yield even better results  
201 than those obtained so far.

202

### 203 **Acknowledgements**

204 The authors acknowledge the TV program “Matsuko no shiranai sekai”  
205 (broadcasted 18 Oct 2016) for reporting on the growing use of UV-cured resins for DIY  
206 jewelry, which sparked the curiosity of one of the authors (CAS) on the suitability of this  
207 medium for otolith embedding. We are also thankful to Ms. Mayumi Otsuki for the careful  
208 EPMA analyzes. This work was partially supported by a grant-in aid for scientific  
209 research (KAKENHI) to C.A.S. (26241018) from the Japan Society for the Promotion of  
210 Science.

211

### 212 **References**

213

214 Arai, T., Chino, N., 2018. Opportunistic migration and habitat use of the giant mottled eel  
215 *Anguilla marmorata* (Teleostei: Elopomorpha). Sci. Rep. doi:10.1038/s41598-018-  
216 24011-z.

217

218 Campana, S.E., 1983. Calcium deposition and otolith check formation during periods of  
219 stress in coho salmon, *Oncorhynchus kisutch*. Comp. Biochem. Physiol. A: Mol. Integr.  
220 Physiol. 75, 215–220.

221

222 Campana, S.E., 1999. Chemistry and composition of fish otolith: pathways, mechanisms  
223 and applications. Mar. Ecol. Prog. Ser. 188, 263–297.

224

225 Campana, S.E., 2005. Otolith science entering the 21<sup>st</sup> century. Mar Freshwater Res. 56,  
226 485–495.

227

228 Campana S.E., Nielson J.D., 1985. Microstructure of fish otoliths. Can. J. Fish. Aquat.  
229 Sci. 42, 1014–1032.

230

231 Campana, S.E., Valentin, A.E., MacLellan, S.E., Groot, J.B., 2016. Image-enhanced burnt  
232 otoliths, bomb radiocarbon and the growth dynamics of redbfish (*Sebastes mentella*  
233 and *S. fasciatus*) off the eastern coast of Canada. Mar. Freshwater Res. 67, 925-936.

234

235 Castellini, D.L., Brown, D., Lajud, N.A., Díaz De Astarloa, J.M., 2017. Juveniles  
236 recruitment and daily growth of the southern stock of *Mugil liza* (Actinopterygii; Fam.  
237 Mugilidae): new evidence for the current life-history model. J. Mar. Biol. Assoc. UK. doi:  
238 10.1017/S0025315417001904.

239

240 Dilly, P.N., 1976. The structure of some cephalopod statolith. Cell Tissue Res. 175, 147–  
241 163.

242

243 Fowler, A.J., 1990. Validation of annual growth increments in the otoliths of a small,  
244 tropical coral reef fish. Mar. Ecol. Prog. Ser. 64, 25–38.

245

246 Grønkjær, P., 2016. Otoliths as individual indicators: a reappraisal of the link between  
247 fish physiology and otolith characteristics. Mar. Freshwater Res. 67, 881–888.

248

249 Hamilton, S.L., Warner, R.R., 2009. Otolith barium profiles verify the timing of  
250 settlement in a coral reef fish. Mar. Ecol. Prog. Ser. 385, 237–244.

251

252 Ichii, T., Mugiya, Y., 1983. Comparative aspects of calcium dynamics in calcified tissues

253 in the goldfish *Carassius auratus*. Nippon Suisan Gakkaishi 49, 1039–1044.

254

255 Jones, C.M., 1992. Development and Application of the Otolith Increment Technique. In:

256 Stevenson DK, Campana SE (eds) Otolith Microstructure Examination and Analysis,

257 Canadian Special Publication of Fisheries and Aquatic Sciences 117. Department of

258 Fisheries and Oceans, Canada, pp 1–11.

259

260 Kono, N., Takahashi, M., Shima, Y., 2014. Time of formation of incremental and

261 discontinuous zones on sagittal otoliths of larval Japanese Spanish mackerel

262 *Scomberomrus niphonius*. Nippon Suisan Gakkaishi 80, 21–26.

263

264 Morales-Nin B., Bjelland, R.M., Moksness, E., 2005. Otolith microstructure of a hatchery

265 reared European hake (*Merluccius merluccius*). Fish. Res. 74, 300-305.

266

267 Mugiya, Y., 1987. Phase difference between calcification and organic matrix formation

268 in the diurnal growth of otoliths in rainbow trout, *Salmo gairdneri*. Fish. Bul. 85, 395–

269 401.

270

271 Neville V., Rose, G., Rowe, S., Jamieson, R., Piercey, G., 2018. Otolith chemistry and  
272 redistributions of Northern cod: evidence of Smith Sound–Bonavista Corridor  
273 connectivity. *Can. J. Fish. Aquat. Sci.* [dx.doi.org/10.1139/cjfas-2017-0357](https://doi.org/10.1139/cjfas-2017-0357).

274

275 Radtke, R.L., 1989. Strontium-calcium concentration ratios in fish otoliths as  
276 environmental indicators. *Comp. Biochem. Physiol. A: Mol. Integr. Physiol.* 92, 189–193.

277

278 Secor, D.H., Dean, J.M., Laban, E.H., 1992. Otolith Removal and Preparation for  
279 Microstructural Examination. In: Stevenson DK, Campana SE (eds) *Otolith  
280 Microstructure Examination and Analysis*, Canadian Special Publication of Fisheries and  
281 Aquatic Sciences 117. Department of Fisheries and Oceans, Canada, pp 19–57.

282

283 Secor, D.H., Rooker, J.R., 2000. Is otolith strontium a useful scalar of life cycles in  
284 estuarine fishes? *Fish. Res.* 46, 359–371.

285

286 Stevenson, D.K., Campana, S.E., 1992. *Otolith Microstructure Examination and Analysis*,  
287 Canadian Special Publication of Fisheries and Aquatic Sciences 117. Department of  
288 Fisheries and Oceans, Canada.



289

290 Stormer, D.G., Juanes, F., 2016. Effects of temperature and ration on the otolith-to-  
291 somatic size relationship in juvenile Chinook salmon (*Oncorhynchus tshawytscha*): a test  
292 of the direct proportionality assumption. Mar. Freshwater Res. 67, 913–924.

293

294 Tsukamoto, K., Umezawa, A., Tabeta, O., Mochioka, N., Kajihara, T., 1989. Age and  
295 birth date of *Anguilla japonica* leptocephali collected in western North Pacific in  
296 September 1986. Nippon Suisan Gakkaishi 55, 1023–1028.

297

298 Watai, M., Ishihara, T., Abe, O., Ohshimo, S., Strüssmann, C.A., 2017. Evaluation of  
299 growth-dependent survival during early stages of Pacific bluefin tuna using otolith  
300 microstructure analysis. Mar Freshwater Res. 68, 2008–2017.

301

302 Watanabe, Y., Kuji, Y., 1991. Verification of daily growth increment formation in saury  
303 otoliths by rearing larvae from hatching. Jpn. J. Ichthyol. 38, 1–15.

304

305 Zenitani, H., Kono, N., Tsukamoto, Y., Mochioka, N., 2007. Increase of otolith Sr:Ca  
306 ratio related to metamorphosis and maturation in anchovy *Engraulis japonicus*. Fish Sci.

307 73: 1395–1397.

308

### 309 **Figure Legends**

310

311 **Fig. 1** Embedding of otoliths using UV-cured resin. A: Fixation of otolith onto a  
312 grinding/polishing guiding block using UV-cured resin; the block is illuminated for about  
313 15 s with a hand-held UV lamp (400 nm) while still on the microscope stage. B:  
314 Hardening of 25 mm-diameter round grinding/polishing blocks including the guiding  
315 block+otolith produced in A; hardening of the blocks is obtained by illumination for 5-  
316 15 min in a commercially available chamber commonly used in nail salons (UV lamp 365  
317 nm; lamp power 9W). C: Appearance of a chum salmon *Oncorhynchus keta* otolith fixed  
318 onto a guiding block and subsequently embedded in the center of a block of UV-cured  
319 resin with total thickness of 25 mm (one side thickness of 12.5 mm); note the high  
320 transparency of the hardened resin. Note also crosshair lines on the surface of the guiding  
321 block that are used for otolith axis and nucleus orientation during sectioning/grinding.  
322 Scale bar represents 1 mm.

323

324 **Fig. 2** Appearance of round slides (25 mm diameter, 1-1.2 mm thick) made of UV-cured

325 resin and which contain otolith specimen cross sections ready for EPMA analysis. The  
326 slides can be mounted directly on the specimen holder of the EPMA equipment. Note the  
327 transparency of the UV-resin blocks in spite of being already coated with Pt-Pd for EPMA  
328 (or SEM) analysis.

329

330 **Fig. 3** Transverse, thin section of a cobaltcap silverside *Hypoatherina tsurugae* otolith  
331 embedded with UV-cured resin. Scale bars represent 200 and 50  $\mu\text{m}$  in A and B,  
332 respectively.

333

334 **Fig. 4** Transverse, thin section of a round herring *Etrumeus teres* otolith embedded with  
335 UV-cured resin. Scale bars represent 200 and 50  $\mu\text{m}$  in A and B, respectively.

336

337 **Fig. 5** Transverse, thin section of a silver croaker *Pennahia argentata* otolith embedded  
338 with UV-cured resin. Scale bars represent 1000 and 200  $\mu\text{m}$  in A and B, respectively.

339

340 **Fig. 6** Comparative deformity on the surface of Epoxy and UV-cured resin blocks  
341 irradiated with an electron beam (diameter of 50  $\mu\text{m}$ ) for 100s during EPMA analysis.  
342 The results suggest comparable thermoplastic stability for UV-cured resin and Epoxy

343 resin under an electron beam. Scale bars represent 10  $\mu\text{m}$ .

344

345 **Fig. 7** Typical results of semi-quantitative EPMA analysis of Epoxy (A) and UV-cured  
346 (B) resin blocks. Results reveal the characteristic presence of Chlorine and Sulphur in  
347 Epoxy and UV-cured resins, respectively.

348

349 **Fig. 8** Results of elemental analysis of the contralateral otoliths from one cobaltcap  
350 silverside *Hypoatherina tsurugae* that were embedded in UV-cured resin and in Epoxy  
351 resin. A) Appearance of the otoliths in SEM view; lines are the marks left by the EPMA  
352 Line analysis (spots with 3  $\mu\text{m}$  diameter, 5  $\mu\text{m}$  spacing). B) and C) Results of MAP  
353 analysis by EPMA of Calcium and Strontium concentration, respectively. D) Results of  
354 EPMA Line analysis of the major elements in cobaltcap otoliths and the calculated Sr/Ca  
355 ratios. Both otoliths were aligned with the ventral side to the left for comparison; negative  
356 and positive values in the X axis represent the distance from the otolith core to the otolith  
357 ventral and dorsal edges, respectively. Results were plotted as the moving average of 5  
358 values.

FIGURE 1

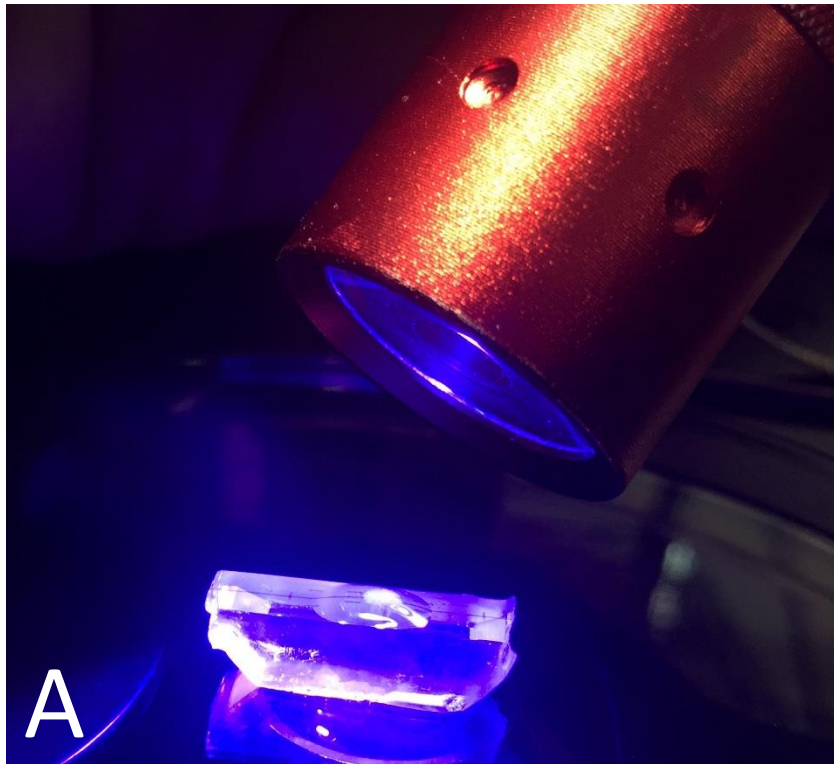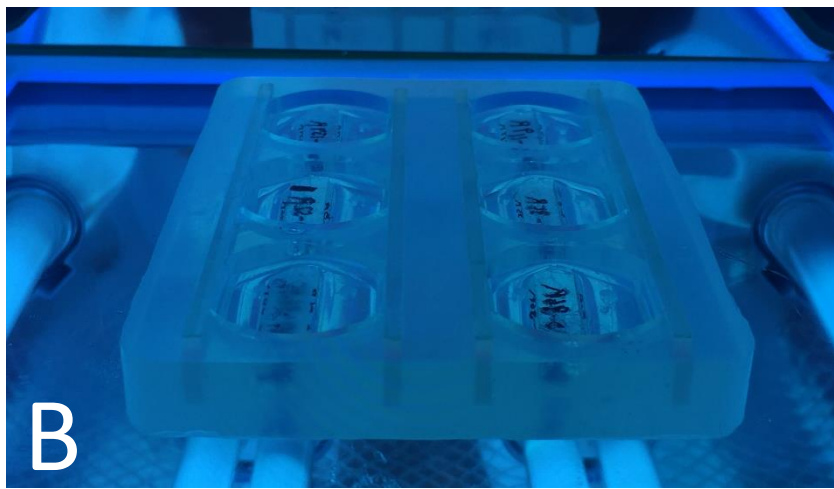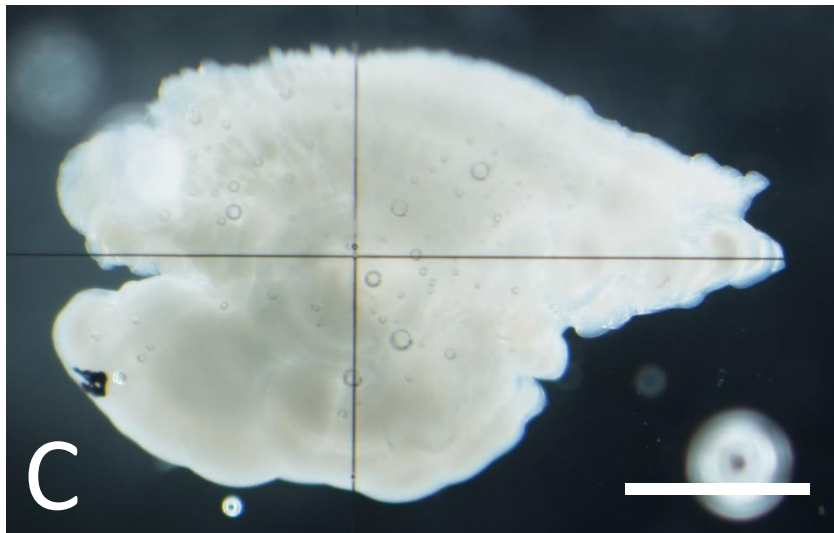

FIGURE 2

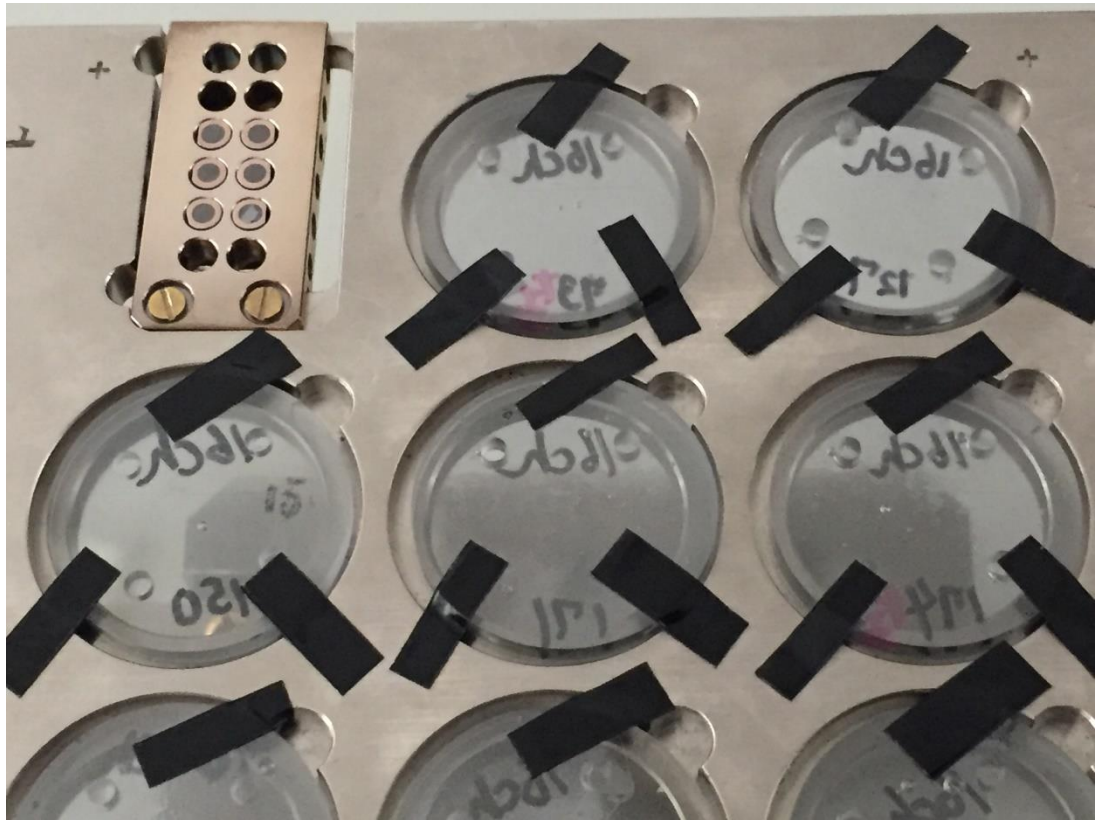

FIGURE 3

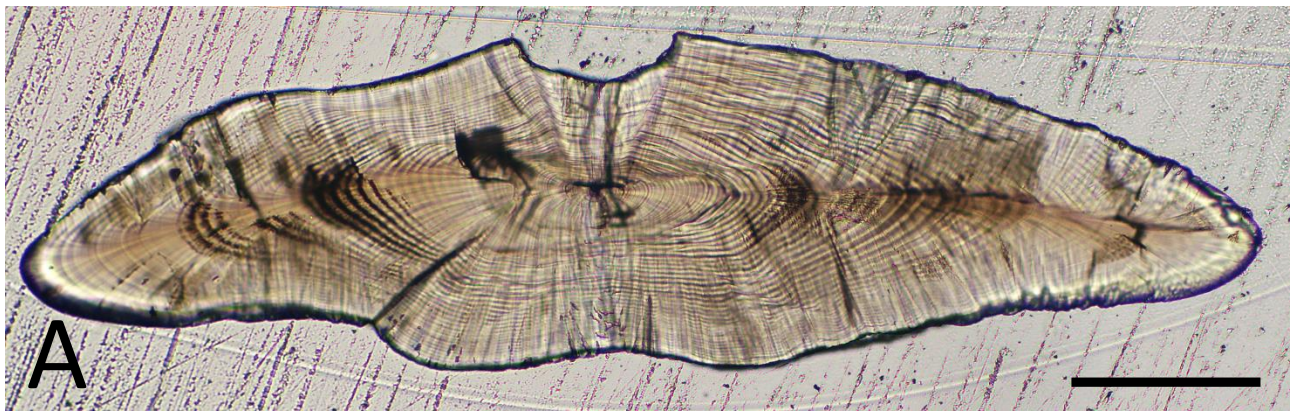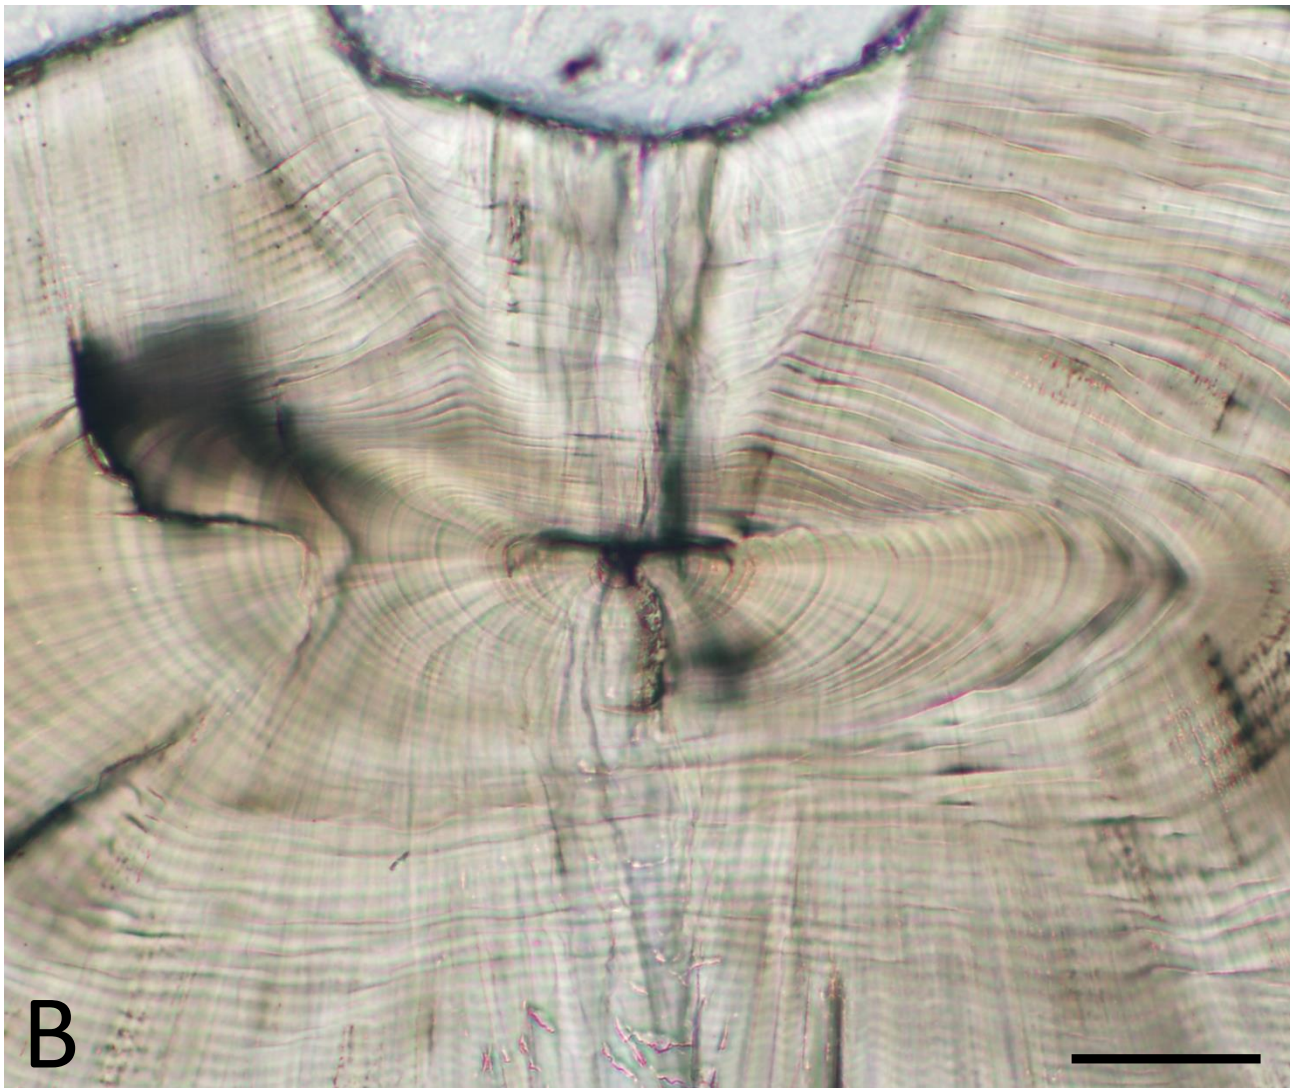

FIGURE 4

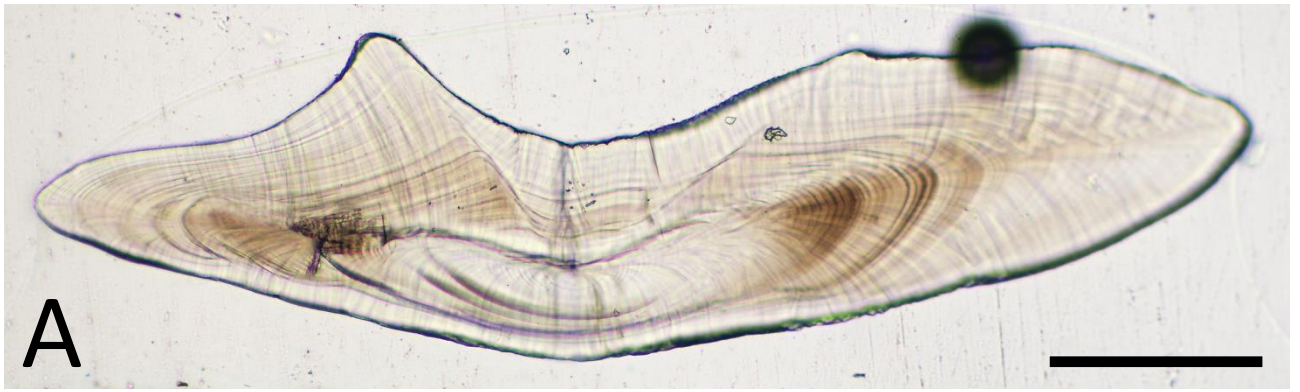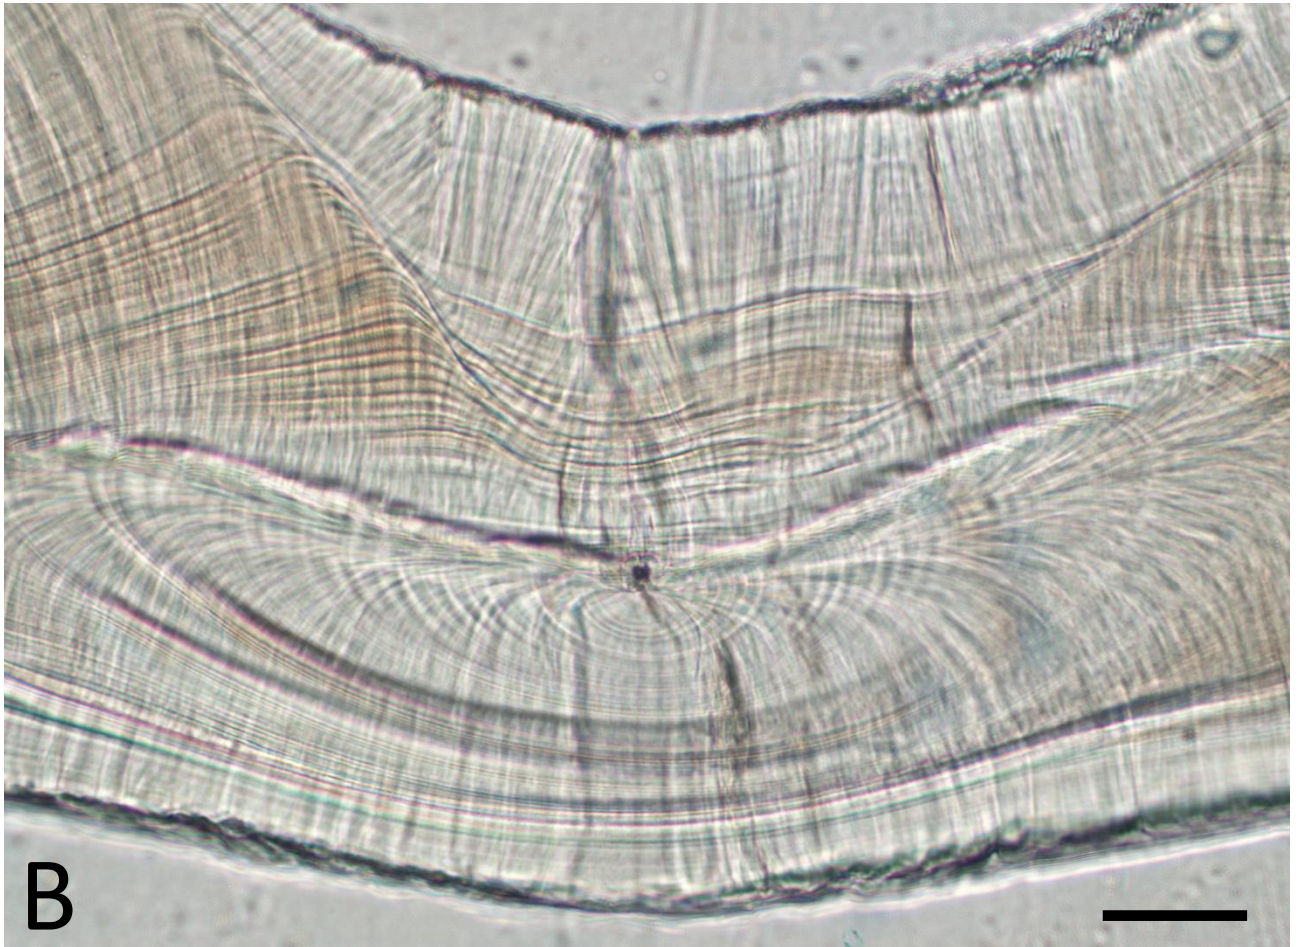



FIGURE 5

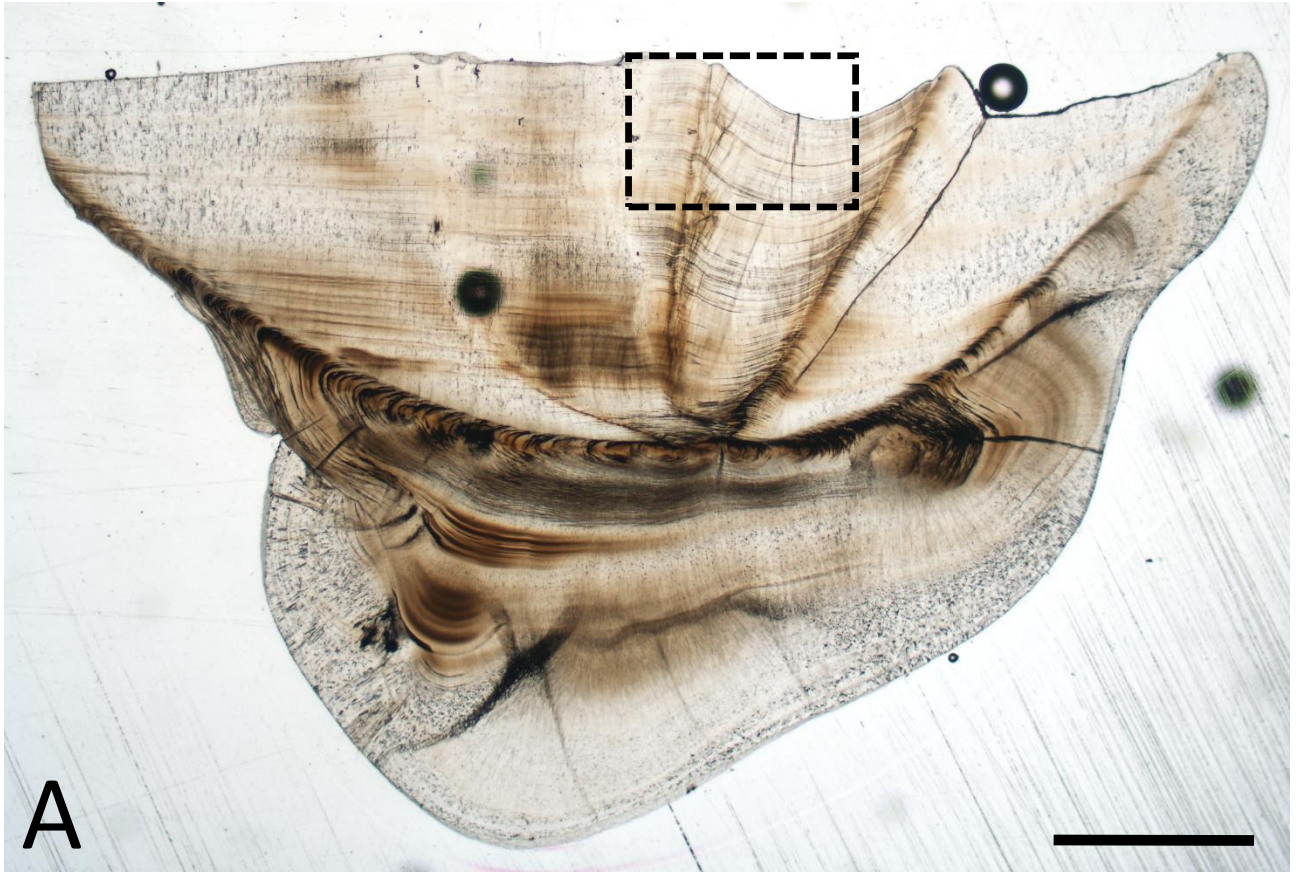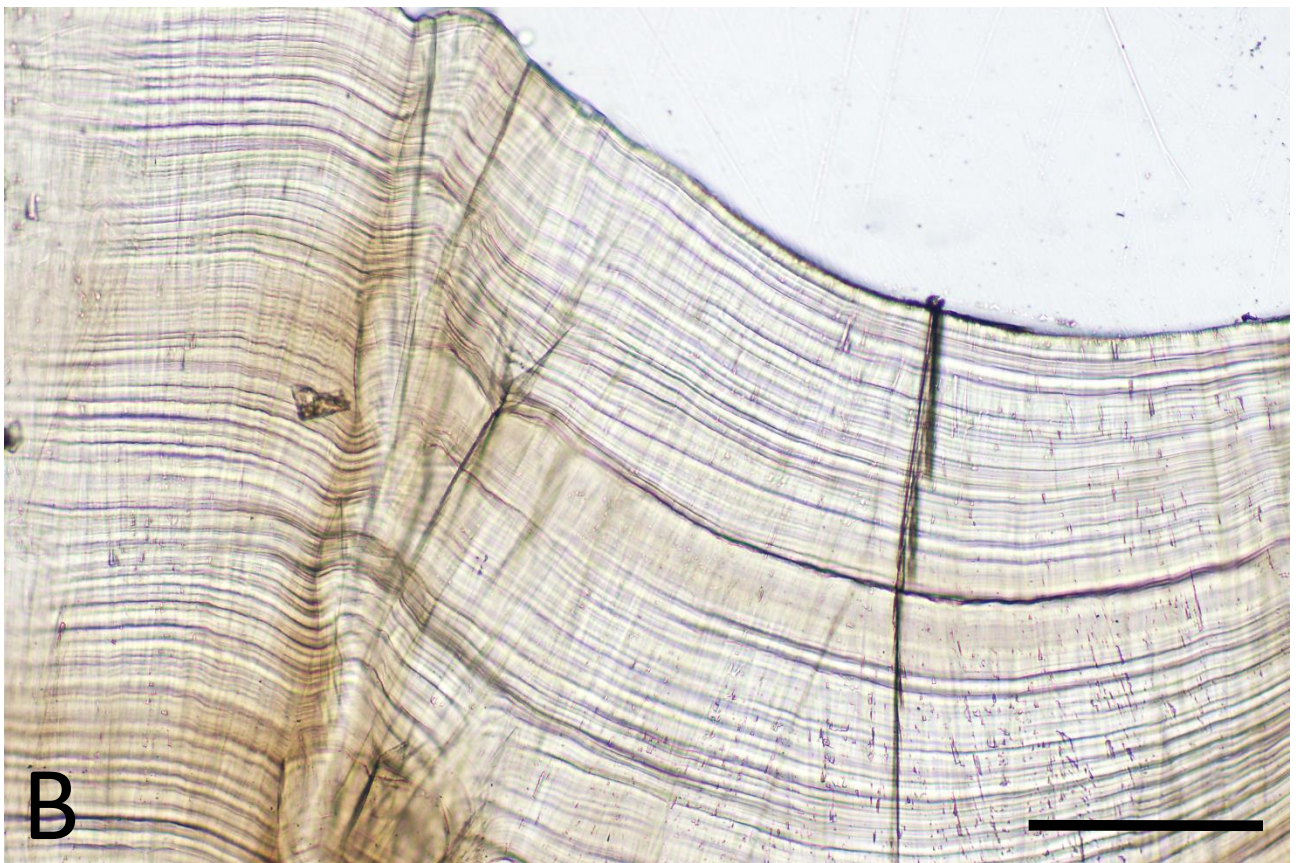

FIGURE 6

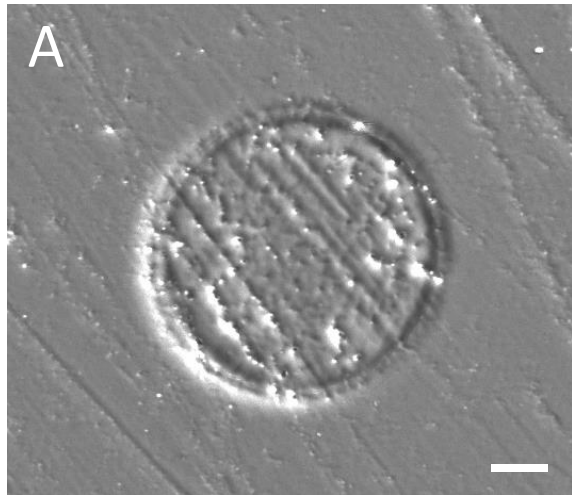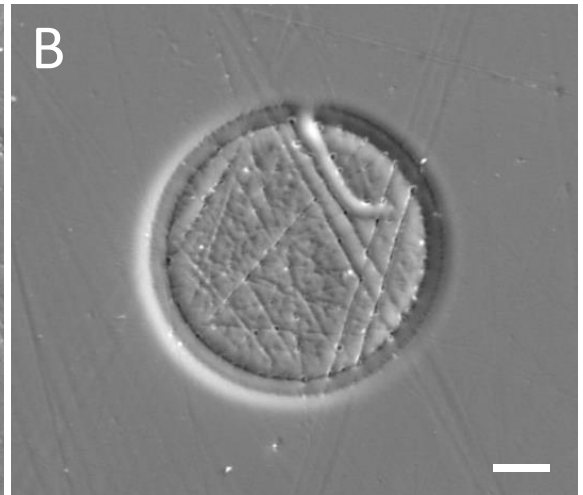

# FIGURE 7

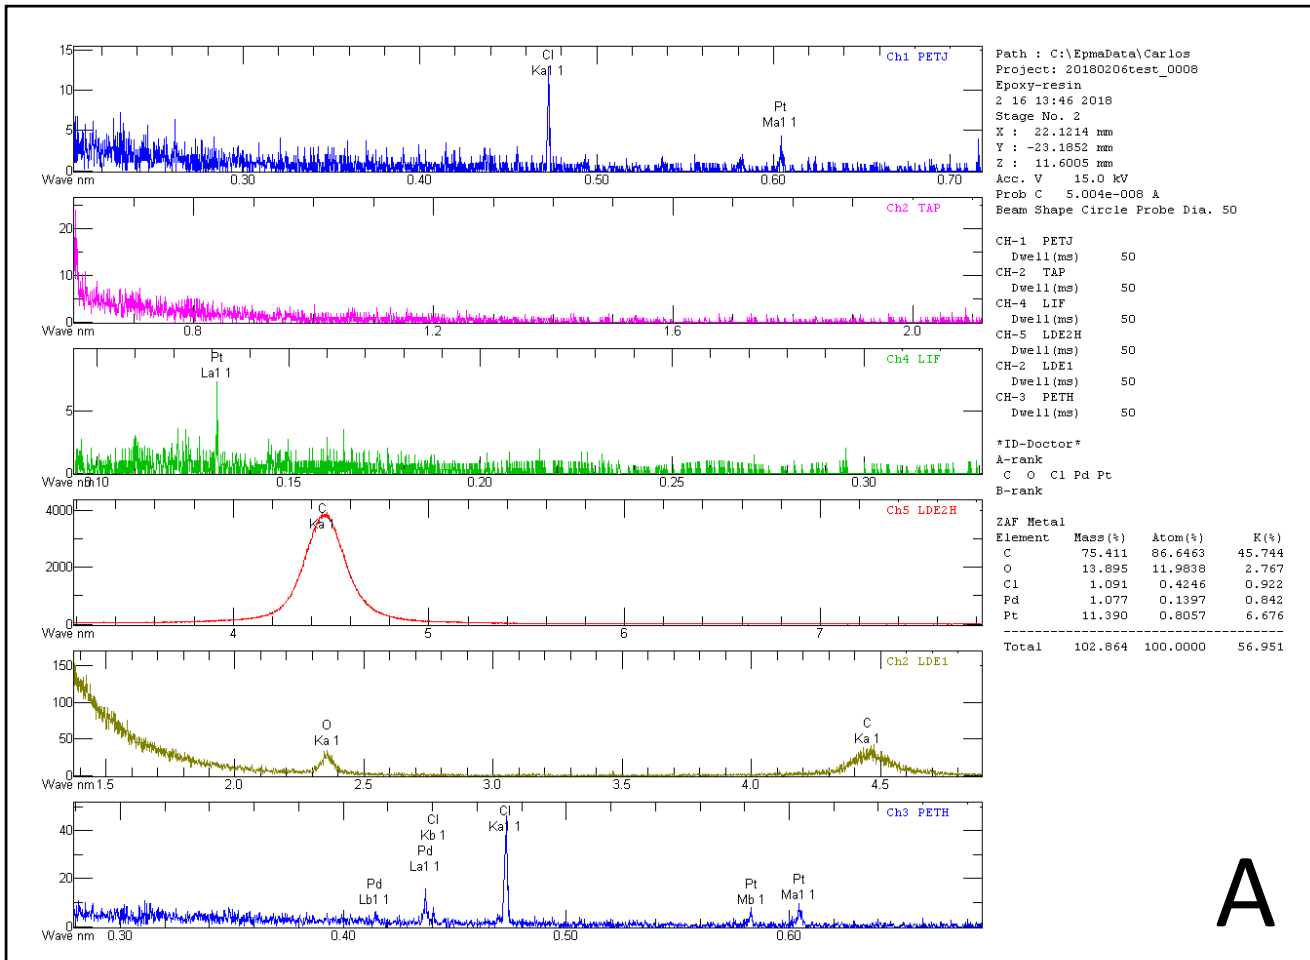

# A

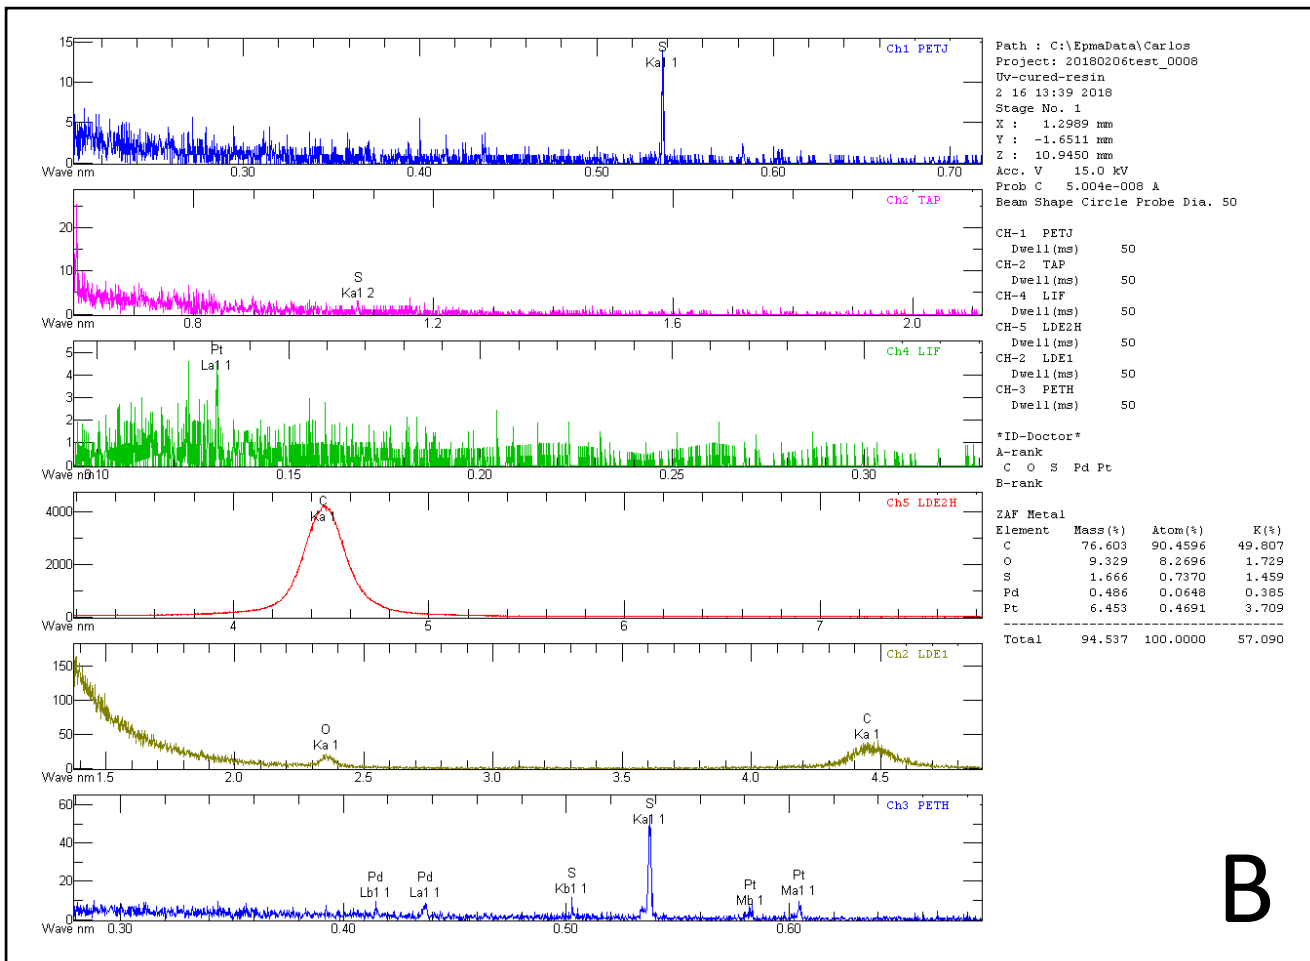

# B

FIGURE 8

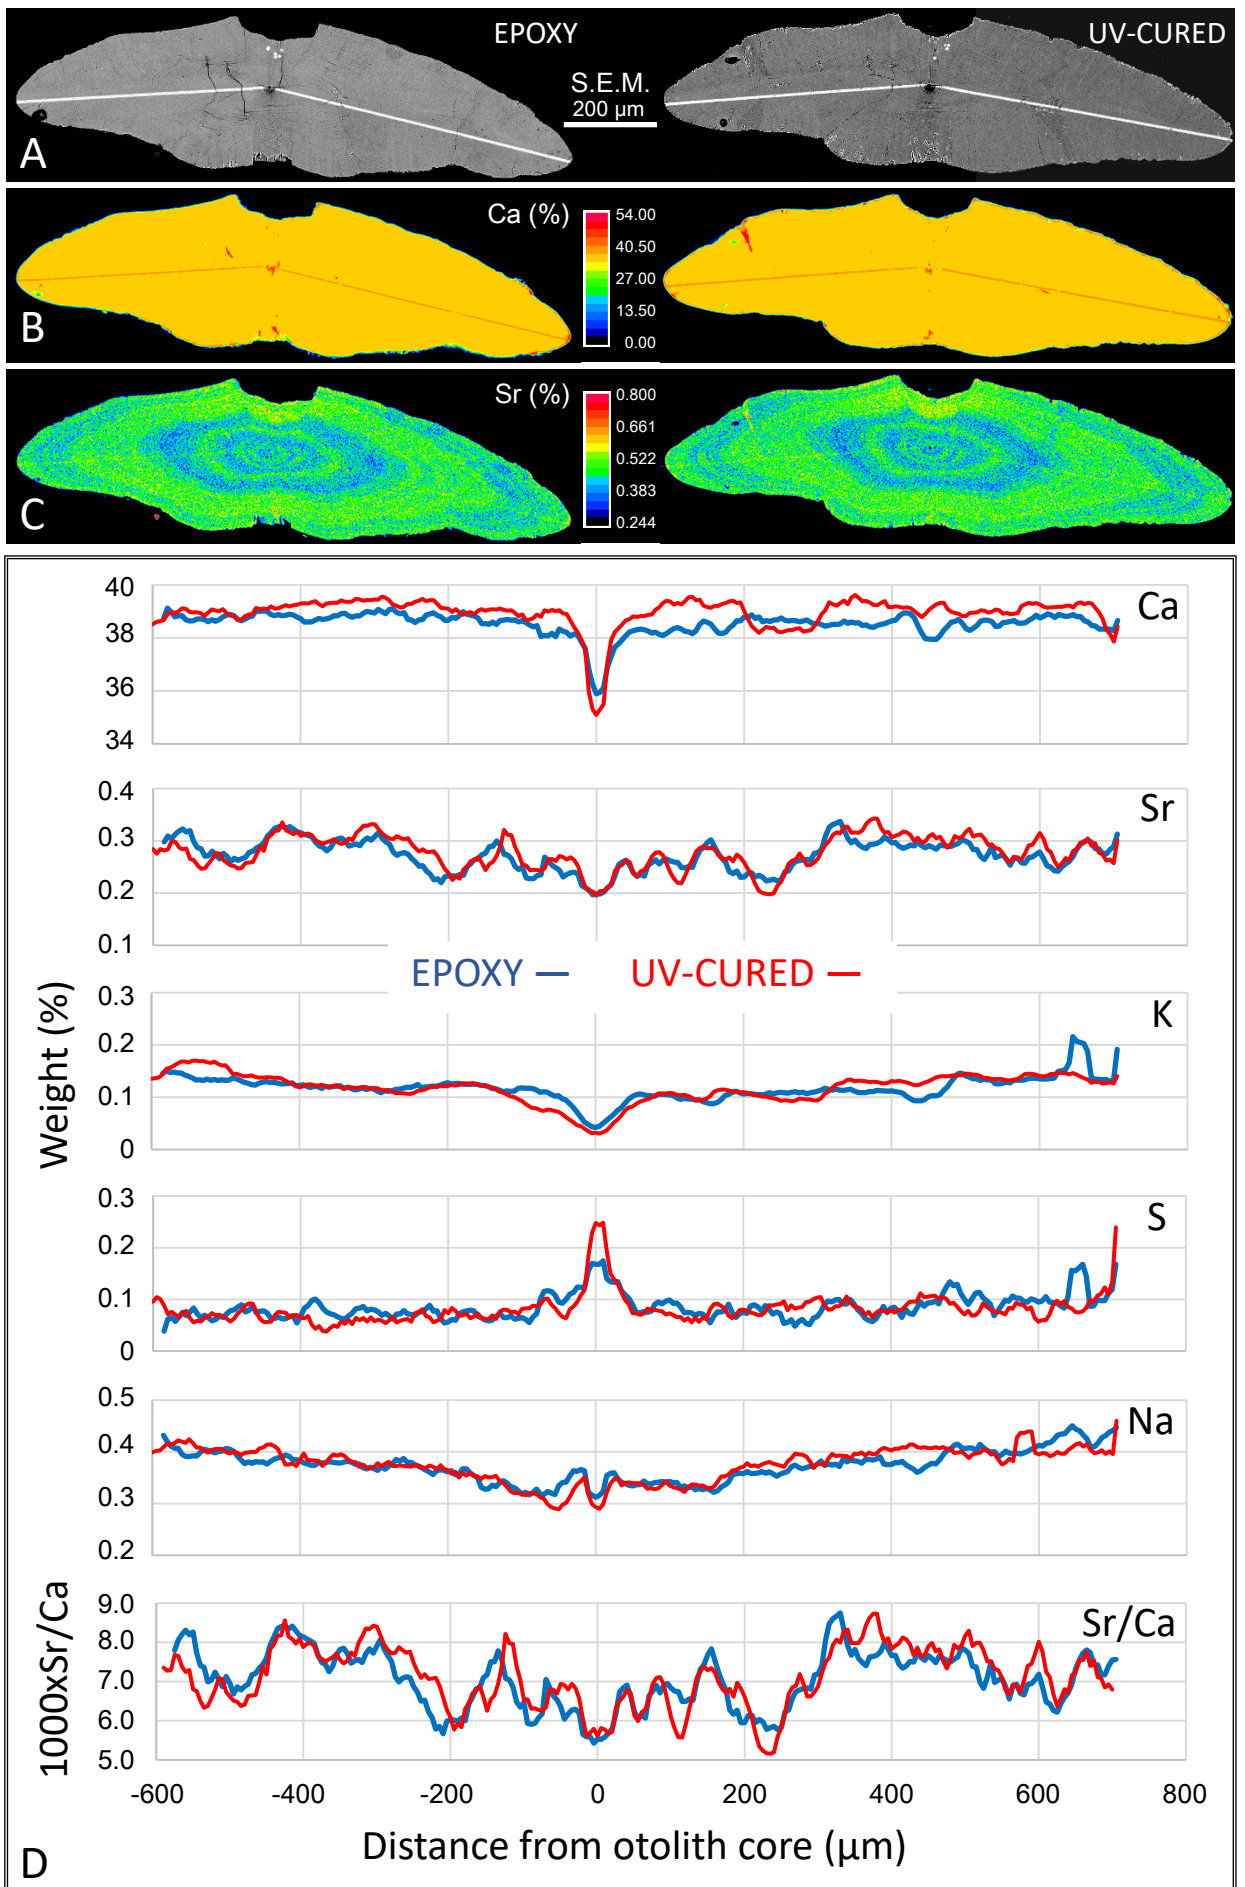

Source: https://www.biorxiv.org/content/10.1101/474643v1.full.pdf
